# Supplementary material for: Outbreak of Norovirus GII.P17-GII.17 in the Canadian Province of Nova Scotia
Source: Hindawi journal article supplement (doi:10.1155/2016/1280247), 2016-01-01
Supplement: f1 [file 1280247.f1.pdf]

## SUPPLEMENTAL INFORMATION

**Figure legends**

**Figure S1.** DNA sequence for region B and C of norovirus GII.P17-GII.17 in Nova Scotia.

**Figure S2.** Real-time RT-PCR primers and probe targets compared to various GII.17 noroviruses. Primer pairs COG2F and COG2R and RING2 were compared to norovirus GII.17 sequences retrieved from the Genbank database and pairwise sequence alignments were performed using BLAST analysis. Genbank accession numbers, strain nomenclature, and abbreviations used in the figure are as follows: KC597139, GII/Hu/GF/1978/GII.17/C142 (GF 1978); EF529741, GII/Hu/FR/2004/GII.17/Briancon870 (FR 2004); AB447409, GII/Hu/IND/2006/GII.17/1668 06 (IND 2006); JQ751044, GII/Hu/CHN/2007/GII.17/Wuhan Z776 (CHN 2007); JF802507, GII/Hu/AF/2009/GII.17/Cameroon C15b (AF 2009); KR020503, GII/Hu/CHN/2014/GII.17/Guangzhou 41621 (CHN 2014); AB983218, GII/Hu/JP/2014/GII.P17 GII.17/Kawasaki323 (JP 2014); KR083017, GII/Hu/US/2014/GII.17/Gaithersburg (US 2014), and GII/Hu/CA/2014/GII.P17 GII.17/NS\_065 (CA 2014). Nucleotide abbreviations include: B = C, G, or T; R = A or G; Y = C or T; N = A, C, G, or T.

## SUPPLEMENTAL INFORMATION

```

...|...| ...|...| ...|...| ...|...| ...|...| ...|...|
  5      15      25      35      45      55
TGAAGATCCC AGTGAGACCA TGATACCACA TGCACAGAGA CCTGTGCAGC TCATGGCACT

...|...| ...|...| ...|...| ...|...| ...|...| ...|...|
 65      75      85      95     105     115
ACTAGGAGAA TCCTCCCTAC ATGGACCCTC ATTTTACAGC AAGGTTAGCA AACTGGTCAT

...|...| ...|...| ...|...| ...|...| ...|...| ...|...|
125     135     145     155     165     175
ATCTGAACTT AAAGAGGGAG GAATGGATTT TTATGTGCCC AGACAAGAGT CAATGTTTCA

...|...| ...|...| ...|...| ...|...| ...|...| ...|...|
185     195     205     215     225     235
ATGGATGAGG TTCTCAGATC TAAGCACATG GGAGGGCGAT CGCAATCTGG CTCCAGTTT

...|...| ...|...| ...|...| ...|...| ...|...| ...|...|
245     255     265     275     285     295
TGTGAATGAA GATGGCGTCG AATGACGCCG CTCCATCTAA TGATGGTGCT GCTGGTCTCG

...|...| ...|...| ...|...| ...|...| ...|...| ...|...|
305     315     325     335     345     355
TACCAGAGGG CAATAACGAG ACCCTTCCCC TAGAACCAGT TGCGGGCGCA GCTATAGCCG

...|...| ...|...| ...|...| ...|...| ...|...| ...|...|
365     375     385     395     405     415
CACCCGTCAC TGGCCAAAAC AACATAATTG ACCCCTGGAT TAGAACAAAT TTTGTGCAAG

...|...| ...|...| ...|...| ...|...| ...|...| ...|...|
425     435     445     455     465     475
CACCAAATGG GGAGTTCACA GTGTCACCCA GAAACTCCCC TGGAGAAATT TTACTAAACC

...|...| ...|...| ...|...| ...|...| ...|...| ...|
485     495     505     515     525     535
TAGAGTTGGG CCCTGATTTG AACCCTTACT TGGCTCATTT GTCAAGGATG TACAA

```

**Figure S1.** DNA sequence for region B and C of norovirus GII.P17-GII.17 in Nova Scotia.

## SUPPLEMENTAL INFORMATION

|          |                             |                      |                       |
|----------|-----------------------------|----------------------|-----------------------|
| COG2F    | CARGARBCNATGTTYAGRTGGATGAG  | -----                | -----                 |
| RING2    | -----                       | TGGGAGGGCGATCGCAATCT | -----                 |
| COG2R    | -----                       | -----                | TGTGAATGAAGATGGCGTCGA |
| GF 1978  | CAAGAGCCAATGTTTCAGATGGATGAG | TGGGAGGGCGATCGCAATCT | TGTGAATGATGATGGCGTCGA |
| FR 2004  | CAAGAGTCAATGTTTCAGATGGATGAG | TGGGAGGGCGATCGCAATCT | TGTGAATGAAGATGGCGTCGA |
| IND 2006 | CAAGAGTCAATGTTTCAGATGGATGAG | TGGGAGGGCGATCGCAATCT | TGTGAATGAAGATGGCGTCGA |
| CHN 2007 | CAAGAGTCAATGTTTCAGATGGATGAG | TGGGAGGGCGATCGCAATCT | TGTGAATGAAGATGGCGTCGA |
| AF 2009  | CAAGAGTCAATGTTTCAGATGGATGAG | TGGGAGGGCGATCGCAATCT | TGTGAATGAAGATGGCGTCGA |
| CHN 2014 | CAAGAGTCAATGTTTCAGATGGATGAG | TGGGAGGGCGATCGCAATCT | TGTGAATGAAGATGGCGTCGA |
| JP 2014  | CAAGAGTCAATGTTTCAGATGGATGAG | TGGGAGGGCGATCGCAATCT | TGTGAATGAAGATGGCGTCGA |
| US 2014  | CAAGAGTCAATGTTTCAGATGGATGAG | TGGGAGGGCGATCGCAATCT | TGTGAATGAAGATGGCGTCGA |
| CA 2014  | CAAGAGTCAATGTTTCAGATGGATGAG | TGGGAGGGCGATCGCAATCT | TGTGAATGAAGATGGCGTCGA |

**Figure S2.** Real-time RT-PCR primers and probe targets compared to various GII.17 noroviruses. Primer pairs COG2F and COG2R and RING2 were compared to norovirus GII.17 sequences retrieved from the Genbank database and pairwise sequence alignments were performed using BLAST analysis. Genbank accession numbers, strain nomenclature, and abbreviations used in the figure are as follows: KC597139, GII/Hu/GF/1978/GII.17/C142 (GF 1978); EF529741, GII/Hu/FR/2004/GII.17/Briancon870 (FR 2004); AB447409, GII/Hu/IND/2006/GII.17/1668 06 (IND 2006); JQ751044, GII/Hu/CHN/2007/GII.17/Wuhan Z776 (CHN 2007); JF802507, GII/Hu/AF/2009/GII.17/Cameroon C15b (AF 2009); KR020503, GII/Hu/CHN/2014/GII.17/Guangzhou 41621 (CHN 2014); AB983218, GII/Hu/JP/2014/GII.P17 GII.17/Kawasaki323 (JP 2014); KR083017, GII/Hu/US/2014/GII.17/Gaithersburg (US 2014), and GII/Hu/CA/2014/GII.P17 GII.17/NS\_065 (CA 2014). Nucleotide abbreviations include: B = C, G, or T; R = A or G; Y = C or T; N = A, C, G, or T.

## SUPPLEMENTAL INFORMATION

1

2 **Table S1.** Primer and probes used in this study.

| Name         | Sequence (5'-3')                   | Location*     | Target<br>(amplicon<br>size)  | Ref.          |
|--------------|------------------------------------|---------------|-------------------------------|---------------|
| COG2F        | CARGARBCNATGTTYAGRTGGATGAG         | 4997-<br>5002 | ORF1-2<br>junction<br>(77 bp) | (19)          |
| COG2R        | TCGACGCCATCTTCATTCACA              | 5054-<br>5074 |                               | (19)          |
| Ring2        | FAM -TGGGAGGGCGATCGCAATCT-<br>BHQ1 | 5022-<br>5041 |                               | (20)          |
| 431F         | TGGACIAGRGGICCYAAYCA               | 4794-<br>4813 | region B<br>and C             | (21)          |
| G2SKR        | CCRCCNGCATRHCCRTTRTACAT            | 5341-<br>5363 | (570 bp)                      | (22)          |
| CapC Rev     | CCTTYCCAkwTCCCAYGG                 | 6644-<br>6662 | ORF2<br>region D<br>(253 bp)  | (22)          |
| CapD3 Fwd    | TGYCTYITICCHCARGAATGG              | 6409-<br>6429 |                               | (22)          |
| CapD1 Fwd    | TGTCTRSTCCCCCAGGAATG               | 6409-<br>6428 |                               | (22)          |
| GV132R**     | CCRGcRAAGAAAGCTCCAGCCAT            | 6681-<br>6703 | ORF3<br>(1721 bp)             | (6)           |
| NoVGII-17F3  | CGGCCCCGACAAAActGAG                | 4656-<br>4673 | ORF1                          | This<br>paper |
| NoVGII-17R3  | CTACTTGAGGGTGGCGTGACAT             | 7312-<br>7333 | ORF3                          | This<br>paper |
| NGII17SeqF11 | TGACGCCGCTCCATCTAA                 | 5076-<br>5093 | ORF2                          | This<br>paper |
| NGII17SeqF12 | AACAGCCGCATGAGATTAGTGG             | 5575-<br>5596 |                               | This<br>paper |

# LEBLANC

|              |                          |               |               |
|--------------|--------------------------|---------------|---------------|
| NGII17SeqF13 | TCCAGCCGACAAAATTCACACCAG | 6200-<br>6223 | This<br>paper |
| NGII17SeqF16 | CCCCATCGATTCGCTTTTCACC   | 5790-<br>5811 | This<br>paper |
| NGII17SeqR12 | TGGCACATCATCAGTTGGGTCAT  | 5993-<br>6015 | This<br>paper |
| NGII17SeqR13 | CGGGTGGCCATCATCGTCAT     | 6236-<br>6255 | This<br>paper |
| NGII17SeqR14 | CCTTCGCCCATTCCCAGTTCC    | 6649-<br>6669 | This<br>paper |
| NGII17SeqR16 | CTAGGCTTTGCAGGTTTGTATTG  | 7080-<br>7102 | This<br>paper |

---

\*Locations of oligonucleotides are relative to norovirus GII/Hu/US/2014/GII.17/Gaithersburg  
(Genbank accession number KR083017).

\*\*Primer GV132R is paired with COG2F to generate the full-length VP1 sequence.
